# Supplementary figures and images for: High temperatures enhance cooperative motions between CBM and catalytic domains of a thermostable cellulase: mechanism insights from essential dynamics
Source: Royal Society of Chemistry journal article supplement (doi:10.1039/c0cp02697b), 2011-01-01

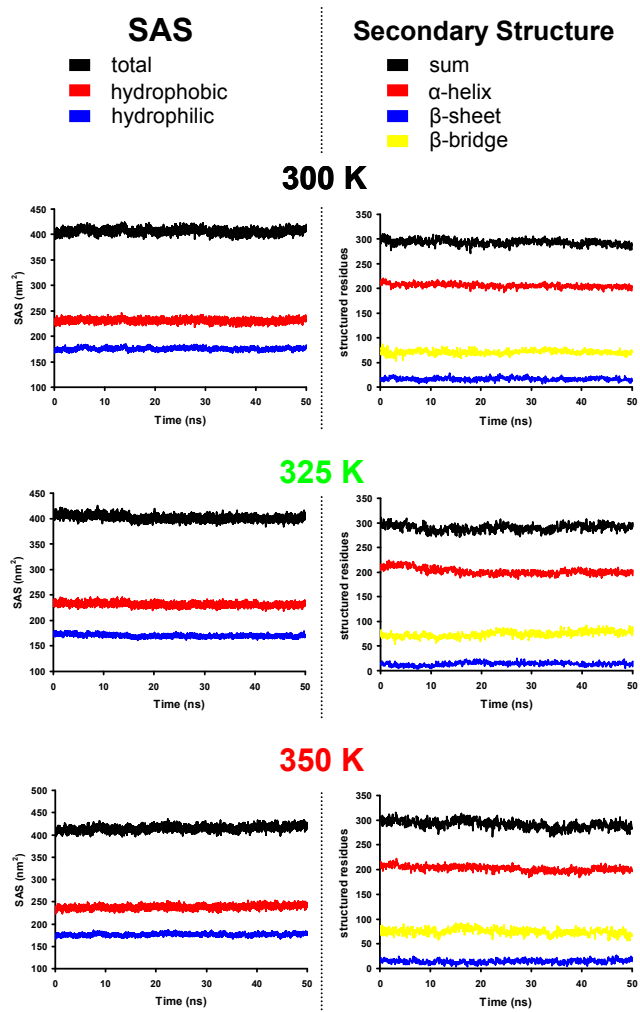

Supplement: c0cp02697b.pdf [file c0cp02697b.pdf]

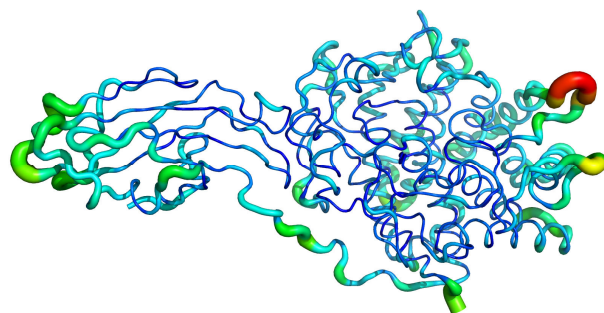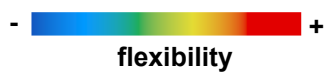

Supplement: c0cp02697b_2.pdf [file c0cp02697b_2.pdf]

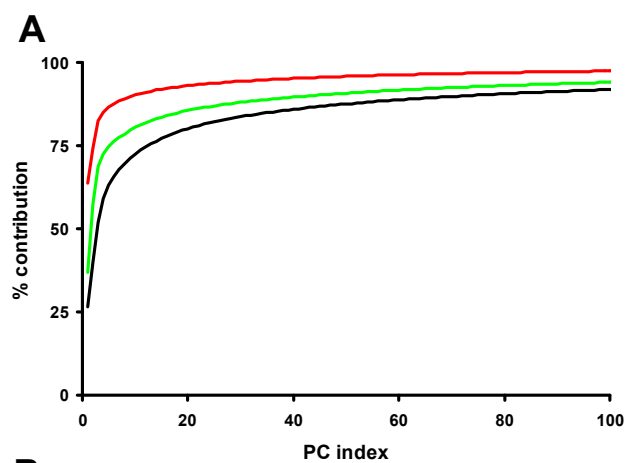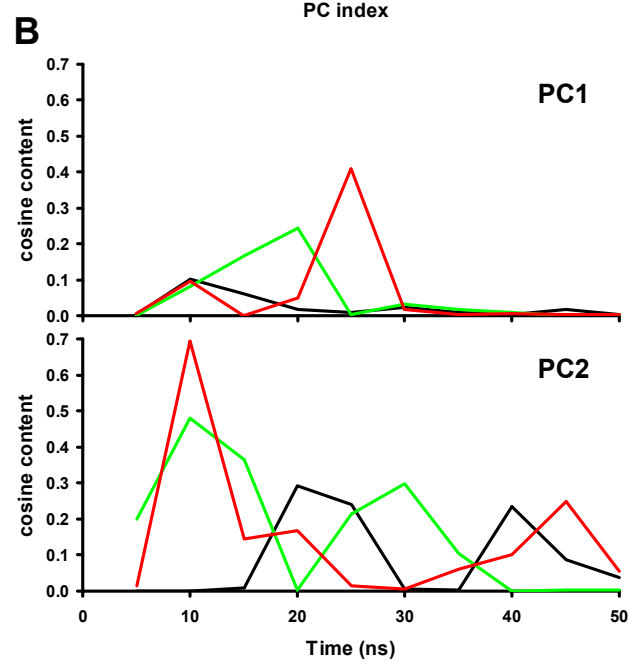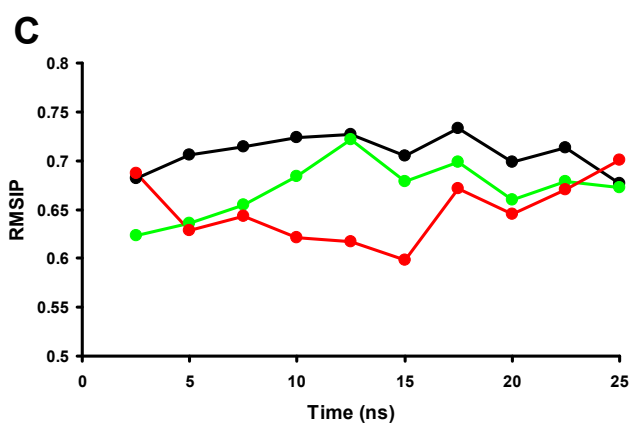

Supplement: c0cp02697b_3.pdf [file c0cp02697b_3.pdf]

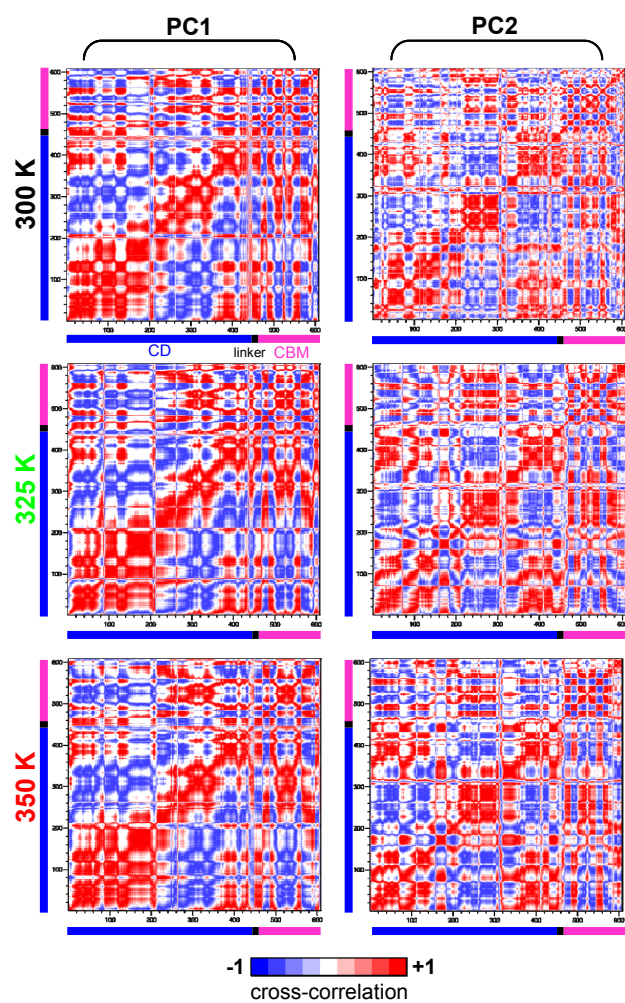

Supplement: c0cp02697b_4.pdf [file c0cp02697b_4.pdf]
